# Supplementary material for: A Contagion Model for Within-Family Transmission of Drug Abuse
Source: Atypon-hosted journal article supplement (doi:10.1176/appi.ajp.2018.18060637), 2019-03-01

## Table S1

### Definition of Drug Abuse

Identified in the medical register by ICD codes (ICD9: Drug psychoses (292) and Drug dependence (304), Nondependent abuse of drugs (305; excluding 305.0); ICD10: Mental and behavioral disorders due to psychoactive substance use (F10-F19), except those due to alcohol (F10) or tobacco (F17)); in the Suspicion Register by codes 3070, 5010, 5011, and 5012, that reflect crimes related to DA (not including drug dealing); and in the Crime Register by references to laws covering narcotics (law 1968:64, paragraph 1, point 6) and drug-related driving offences (law 1951:649, paragraph 4, subsection 2 and paragraph 4A, subsection 2).

Table S2

Descriptive statistics on individuals that moved during the 3-year follow-up time.

|                                              | Full Siblings | Parents       | Cousins        |
|----------------------------------------------|---------------|---------------|----------------|
| HOUSEHOLD (N)                                | 9,464         | 2,651         | -              |
| Residing in same Household within 1 years    | 7,123 (75.3%) | 2,086 (78.7%) | -              |
| Residing in same Household within 2 years    | 5,386 (56.9%) | 1,661 (62.7%) | -              |
| Residing in same Household within 3 years    | 3,998 (42.4%) | 1,310 (49.4%) | -              |
| SAMS (N)                                     | 7,107         | 1,324         | 5,900          |
| Residing in same SAMS within 1 years         | 6,184 (87.0%) | 1,125 (85.0%) | 5,001 (84.8%)  |
| Residing in same SAMS within 2 years         | 5,363 (75.5%) | 961 (72.6%)   | 4,195 (71.1%)  |
| Residing in same SAMS within 3 years         | 4,563 (64.2%) | 850 (64.2%)   | 3,407 (57.8%)  |
| MUNICIPALITY (N)                             | 9,311         | 4,189         | 25,060         |
| Residing in same Municipality within 1 years | 8,564 (92.0%) | 3,854 (92.0%) | 23,240 (92.7%) |
| Residing in same Municipality within 2 years | 7,949 (85.4%) | 3,563 (85.1%) | 21,460 (85.6%) |
| Residing in same Municipality within 3 years | 7,301 (78.4%) | 3,274 (78.2%) | 19,363 (78.4%) |
|                                              |               |               |                |

Table S3

Increased Risk for DA Registration in Potential Secondary Cases 1-3 Years after DA Registration for the original sample as well as the censored sample.

|                     | Full Siblings          | Parents               | Cousins               |
|---------------------|------------------------|-----------------------|-----------------------|
| <b>HOUSEHOLD</b>    |                        |                       |                       |
| Original Sample     | 5.92%<br>(5.00; 6.84)  | 5.82%<br>(4.16; 7.48) | -                     |
| Censored sample     | 8.02%<br>(6.90; 9.14%) | 7.94%<br>(6.28; 9.60) | -                     |
|                     |                        |                       |                       |
| <b>SAMS</b>         |                        |                       |                       |
| Original Sample     | 3.91%<br>(2.82; 5.00)  | 3.50%<br>(1.36; 5.64) | 2.24%<br>(1.46; 3.02) |
| Censored sample     | 4.18%<br>(3.01; 5.35)  | 3.56%<br>(1.42; 5.70) | 2.22%<br>(1.30; 3.14) |
|                     |                        |                       |                       |
| <b>MUNICIPALITY</b> |                        |                       |                       |
| Original Sample     | 1.23%<br>(0.38; 2.08)  | 1.80%<br>(0.44; 3.16) | 0.94%<br>(0.57; 1.31) |
| Censored sample     | 1.12%<br>(0.17; 2.07)  | 1.62%<br>(0.24; 3.00) | 0.79%<br>(0.42; 1.16) |
|                     |                        |                       |                       |

Figure S1

Within and Across Sibling Transmission of Opiate and Cannabis Abuse

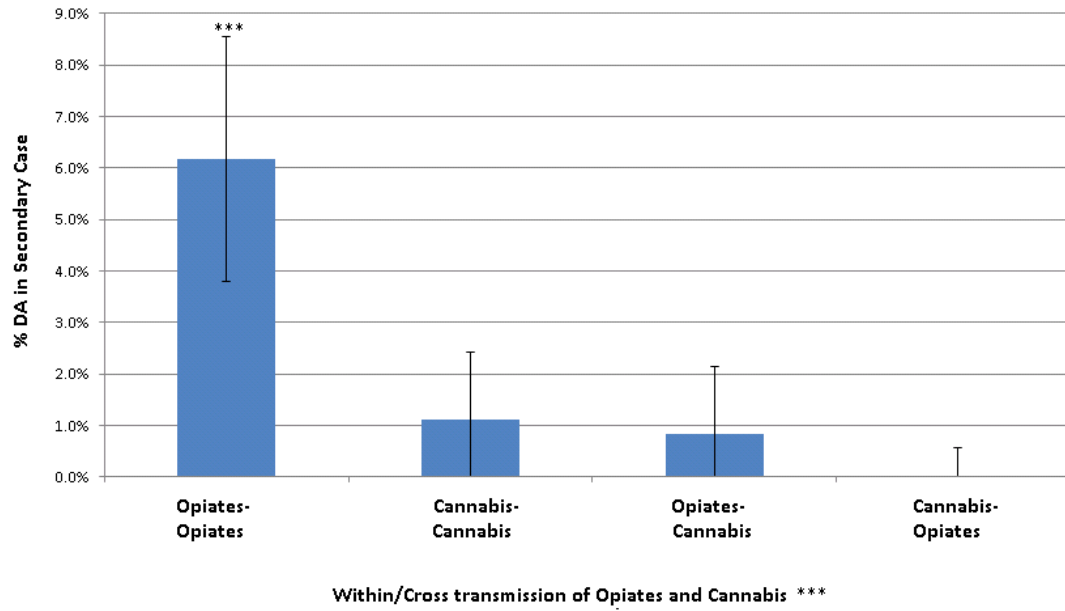

Figure S2a

Increase in Risk for Drug Abuse Registration ( $\pm$  95% CIs) in Siblings of Index Cases Three Years After Drug Abuse Registration in the Index Sibling When Residing in the same Household or SAMS, depicted by the red dotted line. The blue dotted line depicts results in siblings of controls.

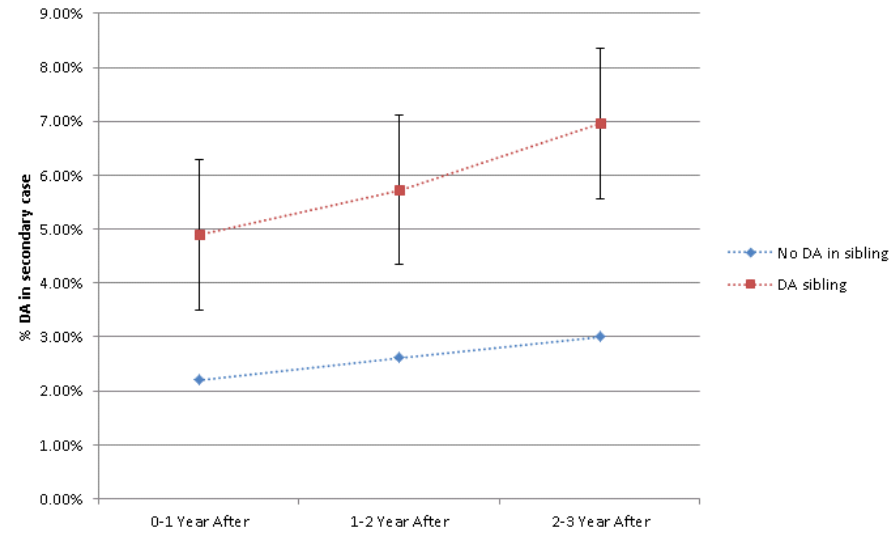

Figure S2b

Increase in Risk for Drug Abuse Registration ( $\pm$  95% CIs) in Siblings of Index Cases Three Years Before and Three Years After Drug Abuse Registration in the Index Sibling When Residing in the same Household or SAMS, depicted by the red dotted line. The blue dotted line depicts results in siblings of controls. The black-dotted line depicts the results expected in the at-risk secondary cases if their parent did not have an index registration for Drug Abuse.

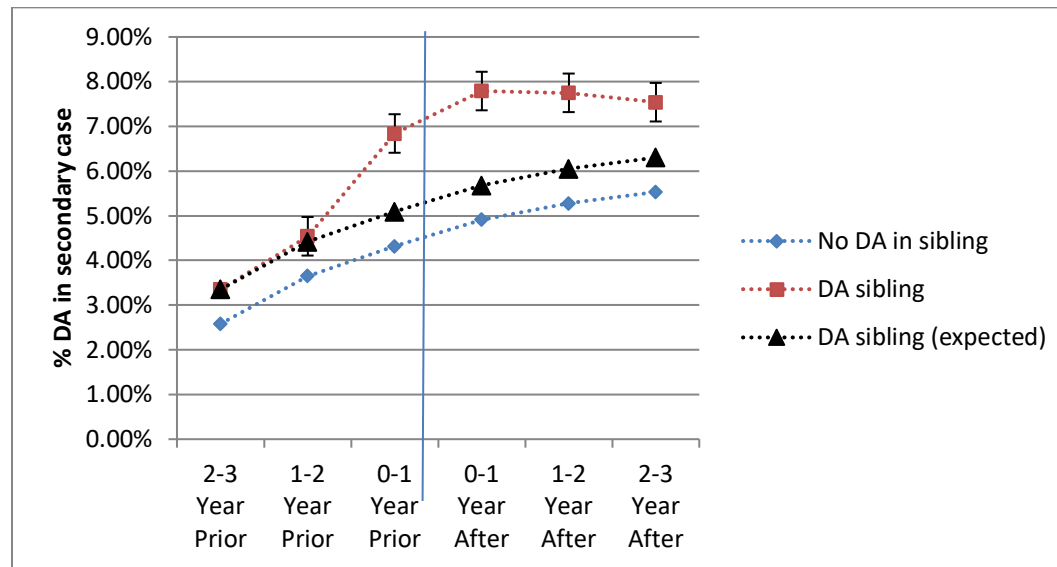

Supplement: appi.ajp.2018.18060637.ds001.pdf [file appi.ajp.2018.18060637.ds001.pdf]
